# Supplementary material
Source: HighWire-hosted journal article supplement (https://jnm.snmjournals.org/highwire/filestream/94095/field_highwire_adjunct_files/0/71779_Supplemental_Figure_1.pdf)

Supplemental Figure 1: A patient with prostate cancer.

Planar images after 15 minutes and 2 hours (A) showed drainage to pelvic sentinel nodes as well as a mid-abdominal sentinel node. The three-dimensional anatomic reconstruction (B) visualized the para-aortic sentinel node in relation to the vessels and also showed the sentinel nodes in the pelvic area. On two-dimensional SPECT/CT fusion images the relation of the retroperitoneal node to the aortic artery was visualized (C, D). The node was located right of the aortic bifurcation (C, D).

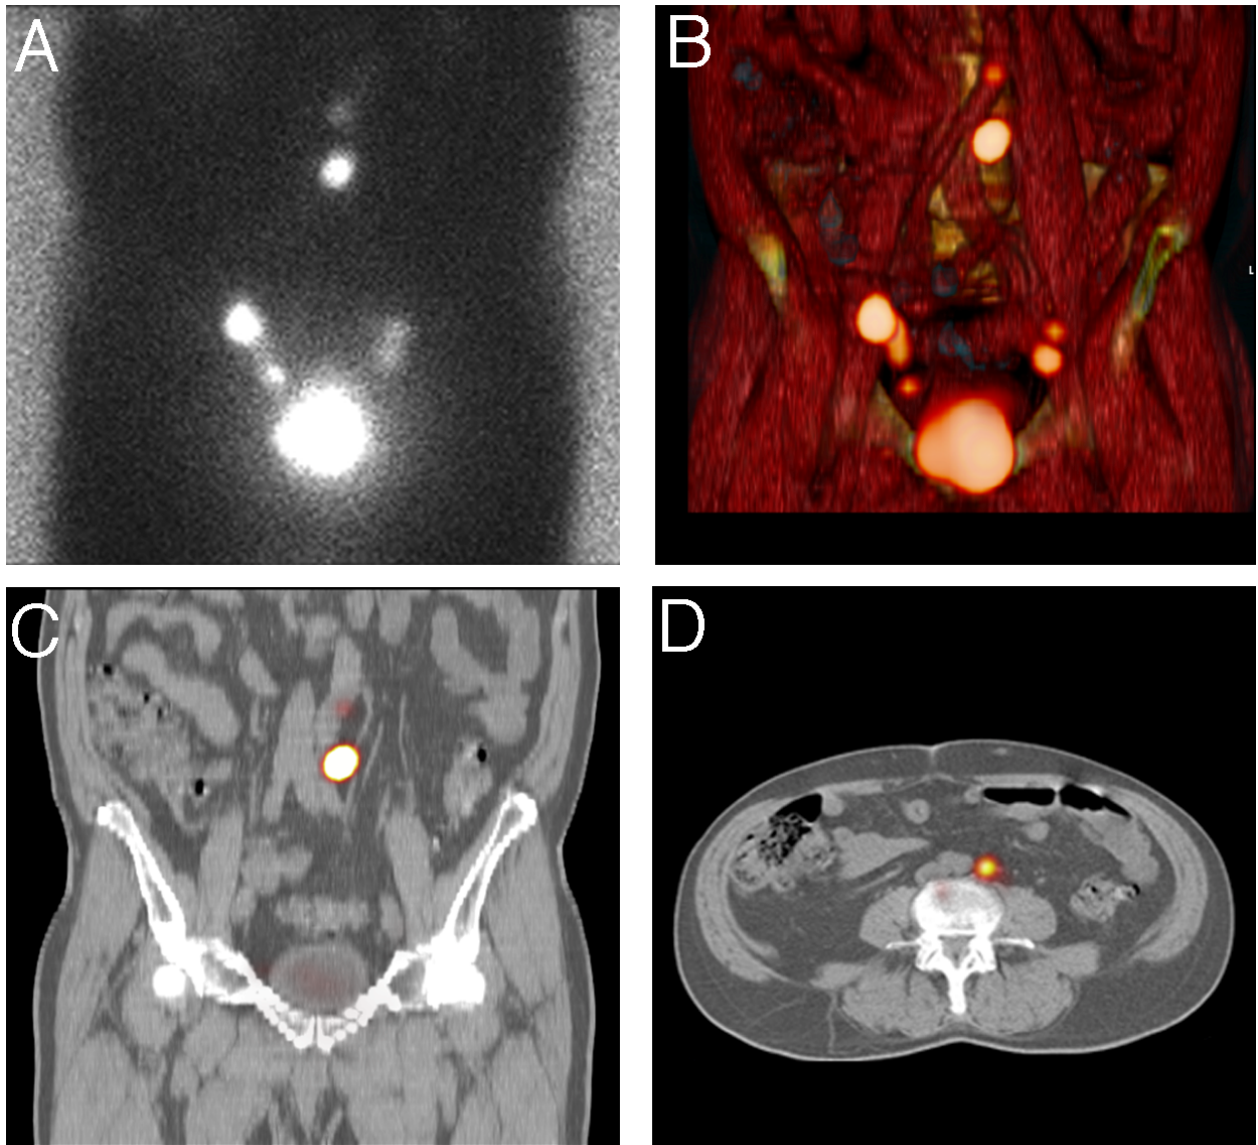

Supplement: 71779_Supplemental_Figure_1.pdf [file 71779_Supplemental_Figure_1.pdf]
